# Supplementary material
Source: publisher figshare collection journal article supplement (https://acs.figshare.com/ndownloader/files/4465084)

# Synthesis of Helical Rod/Coil Multiblock Copolymers by Living Block Copolymerization of Isocyanide and *o*-diisocyanobenzene by Using Arylnickel Initiators

Tetsuya Yamada,<sup>a</sup> and Michinori Suginome<sup>\*a</sup>

*<sup>a</sup>Department of Synthetic Chemistry and Biological Chemistry, Graduate School of Engineering, Kyoto University, Katsura, Nishikyo-ku, Kyoto 615-8510, Japan*

## Contents

*1. General*

*2. Experimental Procedures*

*3. Determination of s.e. of poly(quinoxaline) unit in block copolymer*

*4. Analytical and NMR Data for New Compounds*

*5. CD and UV Spectra of the Polymers*

*(including collected CD spectra of poly-3, 4, (1R)-7, and 8–12)*

## 1. General

All reactions were carried out under an atmosphere of nitrogen with magnetic stirring.  $^1\text{H}$  and  $^{13}\text{C}$  NMR spectra were recorded on a Varian Mercury vx400 or a JEOL JNM-A500 spectrometer at ambient temperature.  $^1\text{H}$  NMR data are reported as follows: chemical shift in ppm downfield from tetramethylsilane ( $\delta$  scale), multiplicity (s = singlet, d = doublet, t = triplet, q = quartet, quint = quintet, sex = sextet, m = multiplet, and br = broad), coupling constant (Hz), and integration.  $^{13}\text{C}$  NMR chemical shifts are reported in ppm downfield from tetramethylsilane ( $\delta$  scale). All  $^{13}\text{C}$  NMR spectra were obtained with complete proton decoupling. CD spectra were recorded on a JASCO J-750 spectrometer. UV spectra were recorded on a JASCO V-500 spectrometer. The GPC analysis was carried out with TSKgel G4000H<sub>HR</sub> ( $\text{CHCl}_3$ , polystyrene standard). Preparative GPC was performed on JAI LC-908 equipped with JAIGEL-1H and -2H columns in a series ( $\text{CHCl}_3$ ).

THF was dried and deoxygenized using an alumina/catalyst column system (GlassContour Co.). Trimethylphenylphosphine (Aldrich) and sodium borohydride (Aldrich) were used as received from the commercial sources.

Arylnickel initiator **1** was prepared by a reaction of *o*-tolyl bromide with  $\text{Ni}(\text{cod})_2$  in the presence of dimethylphenylphosphine according to the literature procedure.<sup>[1]</sup> Arylnickel initiator **2**,<sup>[2]</sup> isocyanides **3-12**,<sup>[3]</sup> and *o*-diisocyanobenzene **13**<sup>[4]</sup> were prepared according to the reported procedures.

---

[1] (a) Ito, Y.; Ihara, E.; Murakami, M. *Polymer J.* **1992**, *24*, 298. (b) Carmona, E.; Paneque, M.; Poveda, M. L. *Polyhedron*, **1989**, *8*, 285.

[2] Yamada, T.; Noguchi, H.; Nagata, Y.; Sugimoto M. *J. Polym. Sci. Part A: Polym. Chem.* **2010**, *48*, 898.

[3] These monomers were prepared from the corresponding nitrobenzoyl chloride and alcohol by standard condition. See Takei, F.; Yanai, K.; Onitsuka, K.; Takahashi, S. *Chem. Eur. J.* **2000**, *6*, 983.

[4] Ito, Y.; Ihara, E.; Uesaka, T.; Murakami, M. *Macromolecules* **1992**, *25*, 6711-6713.

## 2. Experimental Procedures

### 2.1. Typical Procedures for the Synthesis of Poly(isocyanide)s (Table 1)

**Synthesis of homopolymer poly-3 (Table 1. Entry 1):** A stock solution of arylnickel initiator **1** (0.050 M in THF, 50  $\mu$ L, 2.5  $\mu$ mol) was diluted with THF (3.85 mL). To the solution was added a solution of  $\text{PMe}_3$  in THF (1.0 M, 2.5  $\mu$ L, 2.5  $\mu$ mol). After stirring for 15 minutes, a solution of **3** (27.5 mg, 100  $\mu$ mol) in THF (1.25 mL) was added at room temperature. After 3 h,  $\text{NaBH}_4$  (3.7 mg, 100  $\mu$ mol) was added to the reaction mixture at room temperature. After stirring for 15 min. at room temperature, water was added. Extraction with  $\text{CHCl}_3$  followed by preparative GPC gave **poly-3** as orange solid (23.9 mg, 87% yield).

### 2.2. Synthesis of Triblock Copolymer 16 (Figure 2)

To a solution of arylnickel initiator **2** (0.050 M, 50  $\mu$ L, 2.5  $\mu$ mol) in THF (3.85 mL) were added a solution of  $\text{PMe}_3$  in THF (1.0 M, 2.5  $\mu$ L, 2.5  $\mu$ mol) and then a solution of **13** (30.0 mg, 100  $\mu$ mol) in THF (1.25 mL) at room temperature. After 1 h, a small portion of the solution was taken out from the reaction mixture and quenched by  $\text{NaBH}_4$ . This homopolymer **14** was subjected to GPC and CD analyses. To the remaining reaction mixture was added a solution of **3** (27.5 mg, 100  $\mu$ mol) in THF (1.25 mL). After 1 h, a small portion of the solution was taken out from the reaction mixture and quenched by  $\text{NaBH}_4$ . This diblockcopolymer **15** was subjected to GPC and CD analyses. To the remaining mixture was added a solution of **13** (30.0 mg, 100  $\mu$ mol) in THF (1.25 mL). After stirring for further 1 h,  $\text{NaBH}_4$  (3.7 mg, 100  $\mu$ mol) was added to the resulting mixture at room temperature. After stirring for 1 h at room temperature, water was added. Extraction with  $\text{CHCl}_3$  followed by preparative GPC gave block copolymer **16** as orange solid (71.8 mg, 86% yield).

### 2.3. Synthesis of Triblock Copolymer 18 (Scheme 1)

To a solution of arylnickel initiator **1** (0.050 M, 50  $\mu$ L, 2.5  $\mu$ mol) in THF (3.85 mL) were added a solution of  $\text{PMe}_3$  in THF (1.0 M, 2.5  $\mu$ L, 2.5  $\mu$ mol) and then **13** (30.0 mg, 100  $\mu$ mol) at room temperature. After 1 h, a small portion of the solution was taken out from the reaction mixture and quenched by  $\text{NaBH}_4$ . This homopolymer was subjected to GPC analysis. To the remaining reaction mixture was added a solution of **7** (28.5 mg, 100  $\mu$ mol) in THF (1.25 mL). After 1 h, a small portion of the solution was taken out from the reaction mixture and quenched by  $\text{NaBH}_4$ . This diblock copolymer **17**

was subjected to GPC and CD analyses. To the remaining mixture was added a solution of **13** (30.0 mg, 100  $\mu$ mol) in THF (1.25 mL). After stirring for further 1 h, NaBH<sub>4</sub> (3.7 mg, 100  $\mu$ mol) was added to the resulting mixture at room temperature. After stirring for 15 min. at room temperature, water was added. Extraction with CHCl<sub>3</sub> followed by preparative GPC gave block copolymer **18** as orange solid (66.0 mg, 78% yield).

#### 2.4. Synthesis of Pentablock Copolymer **19** (Figure 3)

To a solution of arylnickel initiator **2** (0.050 M, 50  $\mu$ L, 2.5  $\mu$ mol) in THF (3.85 mL) were added a solution of PMe<sub>3</sub> in THF (1.0 M, 2.5  $\mu$ L, 2.5  $\mu$ mol) and then **13** (30 mg, 100  $\mu$ mol) at room temperature. After 1 h, a small portion of the solution was taken out from the reaction mixture and quenched by NaBH<sub>4</sub>. This homopolymer **20** was subjected to GPC and CD analyses. To the remaining reaction mixture was added a solution of **3** (27.5 mg, 100  $\mu$ mol) in THF (1.25 mL). After 1 h, a small portion of the solution was taken out from the reaction mixture and quenched by NaBH<sub>4</sub>. This diblock copolymer **21** was subjected to GPC and CD analyses. To the remaining mixture was added a solution of **13** (30.0 mg, 100  $\mu$ mol) in THF (1.25 mL). After 1 h, a small portion of the solution was taken out from the reaction mixture and quenched by NaBH<sub>4</sub>. This triblock copolymer **22** was subjected to GPC and CD analyses. To the remaining reaction mixture was added a solution of **3** (27.5 mg, 100  $\mu$ mol) in THF (1.25 mL). After 1 h, a small portion of the solution was taken out from the reaction mixture and quenched by NaBH<sub>4</sub>. This tetrablock copolymer **23** was subjected to GPC and CD analyses. To the remaining mixture was added a solution of **13** (30.0 mg, 100  $\mu$ mol) in THF (1.25 mL). After stirring for further 1 h, NaBH<sub>4</sub> (3.7 mg, 100  $\mu$ mol) was added to the resulting mixture at room temperature. After stirring for 15 min. at room temperature, water was added. Extraction with CHCl<sub>3</sub> followed by preparative GPC gave pentablock Copolymer **19** as orange solid (103 mg, 75% yield).

### 3. Determination of s.e. of poly(quinoxaline) unit in block copolymers

#### 3.1. Determination of s.e. of copolymer **17**.

UV spectra of homopolymers **S1**, poly-(1*R*)-**7**, and diblock copolymer **17** are shown below.

**Figure S1.** UV spectra of **S1**, poly-(1*R*)-**7**, and **17**

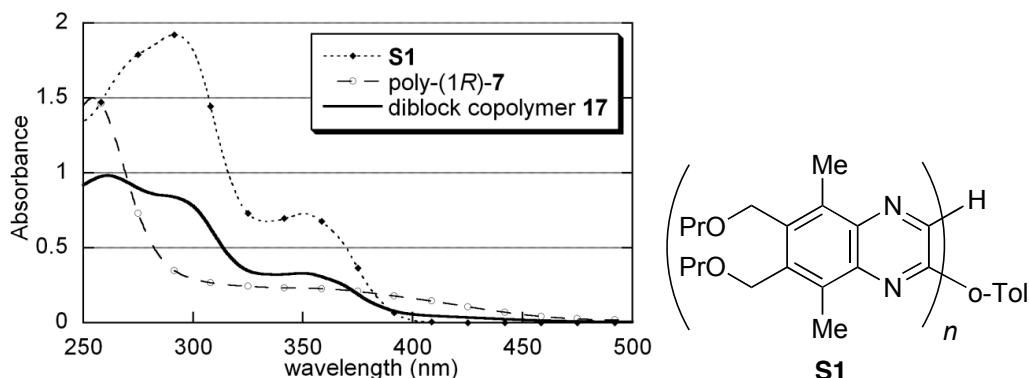

UV spectrum of diblock copolymer **17** is assumed to be the linear combination of the UV spectra of the poly(quinoxaline) block and the poly(iminomethylene) block as shown in eq 1, in which  $A_{\text{poly(quinoxaline)}}$  and  $A_{\text{poly(iminomethylene)}}$  stand for absorption of the respective blocks. Since the UV spectra of the poly(quinoxaline) block and the poly(iminomethylene) block are almost equivalent to those of **S1** and poly-(1*R*)-**7**, respectively, the UV spectrum of **17** ( $A_{17}$ ) can be expressed as shown in equation 2, using  $F_1$  and  $F_2$  as proportionality factors.

$$A_{17} = A_{\text{poly(quinoxaline)}} + A_{\text{poly(iminomethylene)}} \quad (1)$$

$$= F_1 \times A_{\text{S1}} + F_2 \times A_{\text{poly-(1R)-7}} \quad (2)$$

Nonlinear least-squares fitting of the UV spectrum of **17** against the UV spectra of **S1** and poly-(1*R*)-**7** was performed by using the Solver Function in Microsoft Office Excel 2007. Sums of the squares of the deviation were minimized by varying the proportionality factors  $F_1$  and  $F_2$ . These parameters were successfully converged and the final values were as follows.

$$F_1 = 0.3834, \quad F_2 = 0.2816 \quad (3)$$

From equations 1–3, virtual UV absorption of the poly(quinoxaline) unit in copolymer **17** is expressed as shown in equation 4, which leads to the virtual UV spectrum shown in Figure S2.

$$A_{\text{poly(quinoxaline)}} = A_{17} - F_2 \times A_{\text{poly-(1R)-7}} \quad (4)$$

Likewise, virtual CD of the poly(quinoxaline) unit in copolymer **17** is expressed by equation 5, which leads to the virtual CD spectrum shown in Figure S2.

$$\theta_{\text{poly}(\text{quinoxaline})} = \theta_{17} - F_2 \times \theta_{\text{poly}-(1R)-7} \quad (5)$$

**Figure S2.** Virtual UV and CD spectra of poly(quinoxaline) unit in diblock copolymer **17**

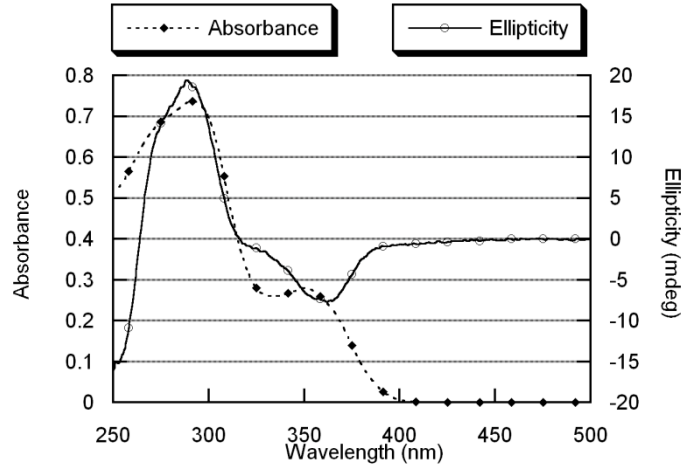

From the UV and CD intensities at 366 nm, the *g* value (Kuhn's dissymmetry ratio) is obtained according to the following equation. In the equations,  $\Delta\epsilon$ ,  $\epsilon$ ,  $[\theta]$ , and *A* stand for circular dichroism (CD), molar absorption coefficient (UV), molar ellipticity (CD), and absorbance (UV), respectively.

$$\begin{aligned} g_{\text{abs}[\text{poly}(\text{quinoxaline})]} &= \Delta\epsilon_{\text{poly}(\text{quinoxaline})} / \epsilon_{\text{poly}(\text{quinoxaline})} \\ &= [\theta]_{\text{poly}(\text{quinoxaline})} / 3298 \times \text{cl} / A_{\text{poly}(\text{quinoxaline})} \\ &= \theta_{\text{poly}(\text{quinoxaline})} / 32.98 \cdot \text{cl} \times \text{cl} / A_{\text{poly}(\text{quinoxaline})} \\ &= \theta_{\text{poly}(\text{quinoxaline})} / 32.98 A_{\text{poly}(\text{quinoxaline})} \end{aligned} \quad (6)$$

Since  $\theta_{\text{poly}(\text{quinoxaline})}$  and  $A_{\text{poly}(\text{quinoxaline})}$  at 366 nm are  $-7.268 \times 10^{-3}$  and 0.2207, respectively, as shown in Figure 2, the *g* value of  $-9.98 \times 10^{-4}$  at 366 nm is obtained. This value corresponds to 42% se for the left-handed helical structure.

### 3.2. Determination of s.e. of the poly(quinoxaline) block in copolymer **18**.

According to the procedure shown above for copolymer **17**,  $F_1$  and  $F_2$  were determined to be 0.6157 and 0.2648, respectively. Virtual UV and CD spectra of the poly(quinoxaline) block in copolymer **18** were drawn as shown in Figure S3.

The screw-sense excess of the helical rod blocks was determined to be 40% se (*M*).

**Figure S3.** Virtual UV and CD spectra of the poly(quinoxaline) blocks in triblock copolymer **18**

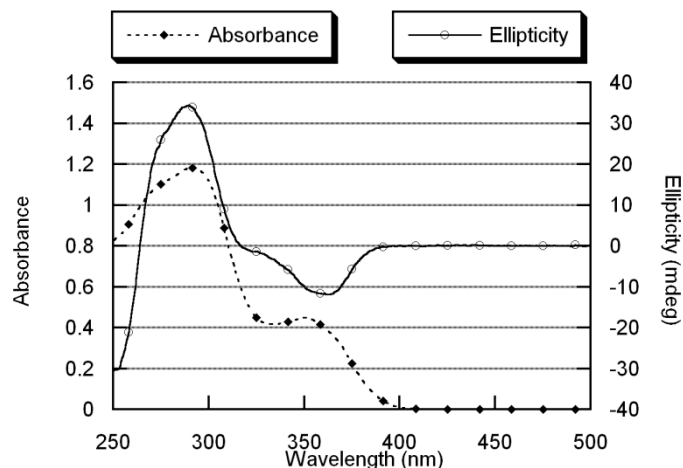

### 3.3. Determination of s.e. of the poly(quinoxaline) block in copolymers 19-23.

According to the procedure 3.1., suitable  $F_1$  and  $F_2$  were obtained from UV spectra for copolymers **19** and **21-23**. The UV and CD spectra for the poly(quinoxaline) homopolymer **20** and the virtual UV and CD spectra for the poly(quinoxaline) blocks of copolymers **19** and **21-23** are shown in Figure S4–S8. From the readings of the absorbance (UV) and the ellipticity (CD), the *g* values for polymers **19–23** are obtained as follows.

homopolymer **20**:  $g_{366} = 1.87 \times 10^{-3}$  (78% s.e.)

diblock copolymer **21**:  $g_{366} = 1.98 \times 10^{-3}$  (82% s.e.)

triblock copolymer **22**:  $g_{366} = 8.78 \times 10^{-4}$  (37% s.e.)

tetrablock copolymer **23**:  $g_{366} = 8.56 \times 10^{-4}$  (36% s.e.)

pentablock copolymer **19**:  $g_{366} = 5.06 \times 10^{-4}$  (21% s.e.)

**Figure S4.** UV/vis absorption spectrum and CD spectrum of homopolymer **20**

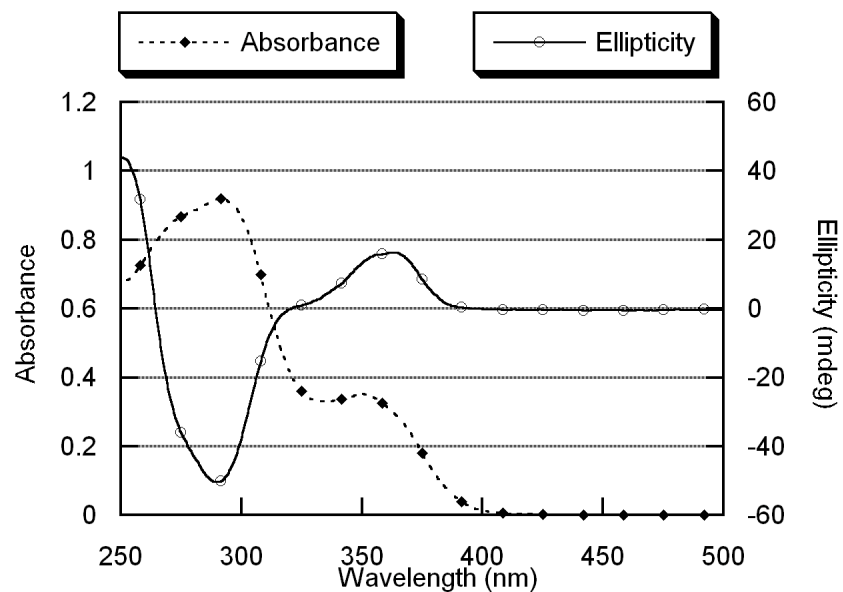

**Figure S5.** Virtual UV and CD spectra of the poly(quinoxaline) block in diblock copolymer **21**

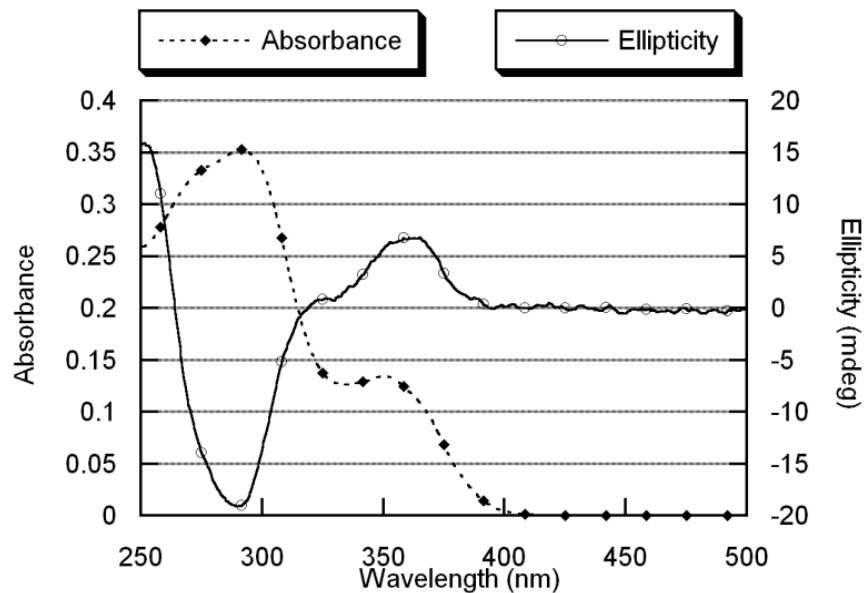



**Figure S6.** Virtual UV and CD spectra of the poly(quinoxaline) blocks in triblock copolymer **22**

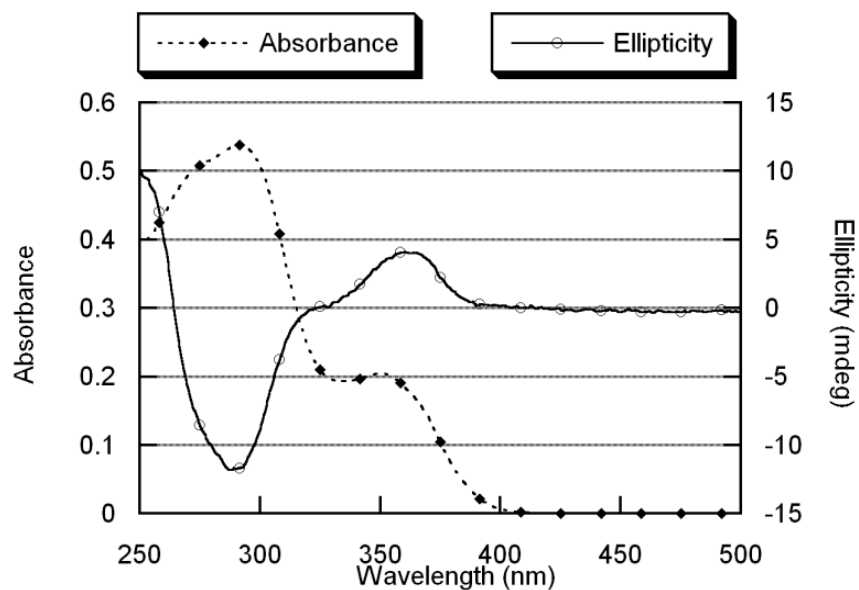

**Figure S7.** Virtual UV and CD spectra of the poly(quinoxaline) blocks in tetrablock copolymer **23**

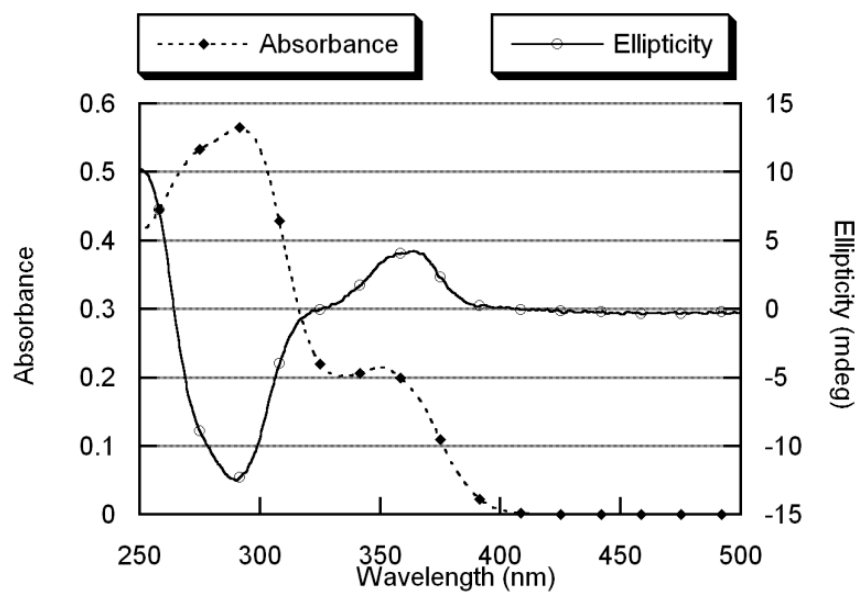

**Figure S8.** Virtual UV and CD spectra of the poly(quinoxaline) blocks in pentablock copolymer **19**

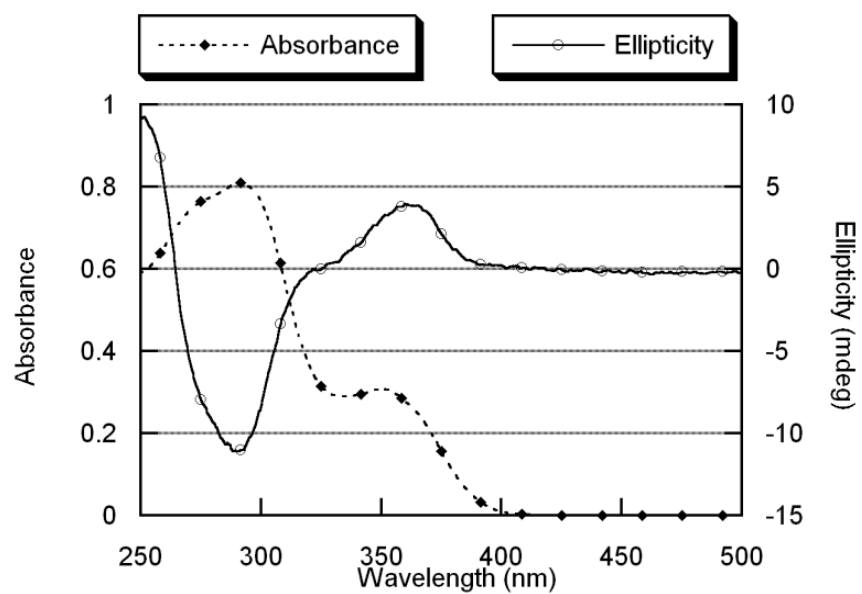

#### 4. Analytical and NMR Data for New Compounds

**5:**  $^1\text{H}$  NMR (400 MHz,  $\text{CDCl}_3$ )  $\delta$  0.99 (t, 7.2 Hz, 3H), 1.65 (sex, 7.2 Hz, 2H), 3.43 (dt, 6.0 Hz, 7.2 Hz, 2H), 7.43-7.46 (m, 2H), 7.78-7.82 (m, 2H);  $^{13}\text{C}$  NMR (125 MHz,  $\text{CDCl}_3$ )  $\delta$  11.4, 22.8, 41.9, 126.6, 128.1, 128.7, 135.6, 165.8, 166.3; IR (KBr) 2129, 1631  $\text{cm}^{-1}$ .

**8:**  $^1\text{H}$  NMR (400 MHz,  $\text{CDCl}_3$ )  $\delta$  0.10 (s, 9H), 1.13-1.17 (m, 2H), 4.42-4.46 (m, 2H), 7.44 (d,  $J = 8.4$  Hz, 2H), 8.07 (d,  $J = 7.6$  Hz, 2H);  $^{13}\text{C}$  NMR (125 MHz,  $\text{CDCl}_3$ )  $\delta$  -1.5, 17.3, 63.8, 126.3, 129.7, 130.6, 131.4, 165.0, 166.9; IR (neat) 2124, 1721  $\text{cm}^{-1}$  Anal. Calcd. for  $\text{C}_{13}\text{H}_{17}\text{NO}_2\text{Si}$ : C, 63.12; H, 6.93; N, 5.66. Found: C, 62.87; H, 7.05; N, 5.52.

**9:**  $^1\text{H}$  NMR (400 MHz,  $\text{CDCl}_3$ )  $\delta$  1.61 (s, 9H), 7.42 (d,  $J = 8.8$  Hz, 2H), 8.02 (d,  $J = 8.4$  Hz, 2H);  $^{13}\text{C}$  NMR (125 MHz,  $\text{CDCl}_3$ )  $\delta$  28.1, 82.0, 126.2, 129.7, 130.6, 132.8, 164.1, 166.6; IR (KBr) 2126, 1717  $\text{cm}^{-1}$ ; Anal. Calcd. for  $\text{C}_{12}\text{H}_{13}\text{NO}_2$ : C, 70.92; H, 6.45; N, 6.89. Found: C, 71.00; H, 6.37; N, 6.89.

**10:**  $^1\text{H}$  NMR (400 MHz,  $\text{CDCl}_3$ )  $\delta$  0.95 (d,  $J = 6.8$  Hz, 12H), 2.05 (octet,  $J = 6.4$  Hz, 2H), 4.85 (t,  $J = 6.0$  Hz, 1H), 7.46 (d,  $J = 8.8$  Hz, 2H), 8.10 (d,  $J = 8.4$  Hz, 2H);  $^{13}\text{C}$  NMR (125 MHz,  $\text{CDCl}_3$ )  $\delta$  17.2, 19.4, 29.5, 84.1, 126.3, 129.7, 130.7, 131.3, 164.8, 166.9; IR (KBr) 2124, 1721  $\text{cm}^{-1}$ ; Anal. Calcd. for  $\text{C}_{18}\text{H}_{23}\text{NO}_2$ : C, 75.76; H, 8.12; N, 4.91. Found: C, 75.83; H, 8.01; N, 4.85.

**11:**  $^1\text{H}$  NMR (400 MHz,  $\text{CDCl}_3$ )  $\delta$  0.99 (s, 6H), 1.12 (s, 6H), 1.14-1.33 (m, 4H), 1.88 (d,  $J = 12.8$  Hz, 2H), 5.29 (tt,  $J = 8.8$  Hz, 3.2 Hz, 1H), 7.44 (d,  $J = 8.4$  Hz, 2H), 8.06 (d,  $J = 8.4$  Hz, 2H);  $^{13}\text{C}$  NMR (125 MHz,  $\text{CDCl}_3$ )  $\delta$  27.8, 32.5, 34.9, 44.4, 51.5, 71.4, 126.3, 129.7, 130.7, 131.7, 164.5, 166.8; IR (neat) 2124, 1719  $\text{cm}^{-1}$ ; Anal. Calcd. for  $\text{C}_{15}\text{H}_{19}\text{NO}_2$ : C, 73.44; H, 7.81; N, 5.71. Found: C, 73.39; H, 7.74; N, 5.61.

**12:**  $^1\text{H}$  NMR (400 MHz,  $\text{CDCl}_3$ )  $\delta$  0.98-1.31 (m, 12H), 1.65-1.76 (m, 10H), 4.89 (t, 6.0 Hz, 1H), 7.45 (d,  $J = 8.4$  Hz, 2H), 8.09 (d,  $J = 8.0$  Hz, 2H);  $^{13}\text{C}$  NMR (125 MHz,  $\text{CDCl}_3$ )  $\delta$  26.0, 26.1, 26.3, 27.6, 30.0, 38.5, 82.9, 126.4, 129.7, 130.8, 131.5, 164.9, 166.8; IR (neat) 2122, 1723  $\text{cm}^{-1}$ .

Monomers **3**, **4**, **6** and (1*R*)-**7** are known compounds. CAS numbers of these monomers are shown below.

**3**: 205495-60-9

**4**: 288154-56-3

**6**: 602262-09-3

(1*R*)-**7**: 254116-83-1

## 2. polymers

**Poly-3 (achiral initiator, Table1, Entry 1)**: <sup>1</sup>H NMR (400MHz, CDCl<sub>3</sub>) δ 1.28 (br, 10*n*H), 4.99 (br, 4*n*H), 5.72-8.56 (m, 3*n*H).

**Poly-4 (achiral initiator, Table1, Entry 2)**: <sup>1</sup>H NMR (400MHz, CDCl<sub>3</sub>) δ 1.01 (br, 3*n*H), 1.63 (br, 2*n*H), 3.48-4.74 (m, 2*n*H), 5.38-8.46 (m, 4*n*H).

**Poly-(1*R*)-7 (Table1, Entry 5)**: <sup>1</sup>H NMR (400MHz, CDCl<sub>3</sub>) δ 0.22-2.58 (m, 18*n*H), 4.92 (br, *n*H), 5.97 (br, 2*n*H), 6.50-8.04 (m, 2*n*H).

**Poly-3 (chiral initiator, Table1, Entry 6)**: <sup>1</sup>H NMR (400MHz, CDCl<sub>3</sub>) δ 0.93 (br, 6*n*H), 1.58 (br, 4*n*H), 2.91-4.78 (m, 4*n*H), 5.22-8.56 (m, 3*n*H).

**Poly-4 (chiral initiator, Table1, Entry 7)**: <sup>1</sup>H NMR (400MHz, CDCl<sub>3</sub>) δ 1.27 (br, 5*n*H), 4.99 (br, 2*n*H), 5.86-8.10 (m, 4*n*H).

**Poly-8 (Table1, Entry 8)**: <sup>1</sup>H NMR (400MHz, CDCl<sub>3</sub>) δ 0.08 (br, 9*n*H), 1.00 (br, 2*n*H), 3.63-4.76 (m, 2*n*H), 5.83 (br, 2*n*H), 6.56-8.20 (m, 2*n*H).

**Poly-9 (Table1, Entry 9)**: <sup>1</sup>H NMR (400MHz, CDCl<sub>3</sub>) δ 1.43 (br, 9*n*H), 5.90 (br, 2*n*H), 6.36-8.02 (m, 2*n*H).

**Poly-10 (Table1, Entry 10)**: <sup>1</sup>H NMR (400MHz, CDCl<sub>3</sub>) δ 1.05 (br, 16*n*H), 1.74 (br, 2*n*H), 5.03 (br, *n*H), 5.76 (br, 2*n*H), 6.22-7.94 (m, 2*n*H).

**Poly-11 (Table1, Entry 11)**: <sup>1</sup>H NMR (400MHz, CDCl<sub>3</sub>) δ 0.84 (br, 12*n*H), 1.90 (br, 2*n*H), 4.63 (br, *n*H), 5.92 (br, 2*n*H), 6.70-8.10 (m, 2*n*H).

**Poly-12 (Table1, Entry 12):**  $^1\text{H}$  NMR (400MHz,  $\text{CDCl}_3$ )  $\delta$  0.38-2.12 (m, 22nH), 4.63 (br, nH), 5.03 (br, 2nH), 6.64-8.16 (m, 2nH).

**Triblock copolymer 16a:**  $^1\text{H}$  NMR (400MHz,  $\text{CDCl}_3$ )  $\delta$  0.90 (br,  $(6(n+l)+6m)\text{H}$ ), 1.60 (br,  $(4(n+l)+4m)\text{H}$ ), 2.35 (br,  $6(n+l)\text{H}$ ), 3.46 (br,  $4(n+l)\text{H}$ ), 4.57 ( $4(n+l)+4m\text{H}$ ). The  $sp^2$ -protons on benzene ring of monoisocyanide **3** were not detectable by NMR measurements.

**Triblock copolymer 16b:**  $^1\text{H}$  NMR (400MHz,  $\text{CDCl}_3$ )  $\delta$  0.90 (br,  $(6(n+l)+6m)\text{H}$ ), 1.60 (br,  $(4(n+l)+4m)\text{H}$ ), 2.35 (br,  $6(n+l)\text{H}$ ), 3.47 (br,  $4(n+l)\text{H}$ ), 4.56 ( $4(n+l)+4m\text{H}$ ). The  $sp^2$ -protons on benzene ring of monoisocyanide **3** were not detectable by NMR measurements.

**Triblock copolymer 16c:**  $^1\text{H}$  NMR (400MHz,  $\text{CDCl}_3$ )  $\delta$  0.90 (br,  $(6(n+l)+6m)\text{H}$ ), 1.60 (br,  $(4(n+l)+4m)\text{H}$ ), 2.34 (br,  $6(n+l)\text{H}$ ), 3.45 (br,  $4(n+l)\text{H}$ ), 4.56 ( $4(n+l)+4m\text{H}$ ), 5.86-7.80 (m,  $3m\text{H}$ ).

**Triblock copolymer 18:**  $^1\text{H}$  NMR (400MHz,  $\text{CDCl}_3$ )  $\delta$  0.91 (br,  $6(n+l)\text{H}$ ), 1.60 (br,  $4(n+l)\text{H}$ ), 2.35 (br,  $6(n+l)\text{H}$ ), 0.24-2.67 (br,  $18m\text{H}$ ), 3.47 (br,  $4(n+l)\text{H}$ ), 4.57 (br,  $(4(n+l)+m)\text{H}$ ), 5.95 (br,  $2m\text{H}$ ), 6.32-8.04 (m,  $2m\text{H}$ ).

**pentablock copolymer 19:**  $^1\text{H}$  NMR (400MHz,  $\text{CDCl}_3$ )  $\delta$  0.90 (br,  $\{6(n+l+j)+6(m+k)\}\text{H}$ ), 1.27 (br,  $4(m+k)\text{H}$ ), 1.60 (br,  $4(n+l+j)\text{H}$ ), 2.35 (br,  $6(n+l+j)\text{H}$ ), 3.47 (br,  $4(n+l+j)\text{H}$ ), 4.56 (br,  $4(n+l+j)\text{HH}$ ), 4.98 (br,  $4(m+k)\text{H}$ ), 5.86-7.80 (m,  $3m\text{H}$ ).

## 5. CD and UV Spectra of the Polymers

**Figure S9.** Collected CD spectra of poly(*N*-aryliminomethylene)s poly-3, poly-4, poly-(1*R*)-7, poly-8, poly-9, poly-10, poly-11, and poly-12. Individual CD charts are shown below in Figure S10–S17.

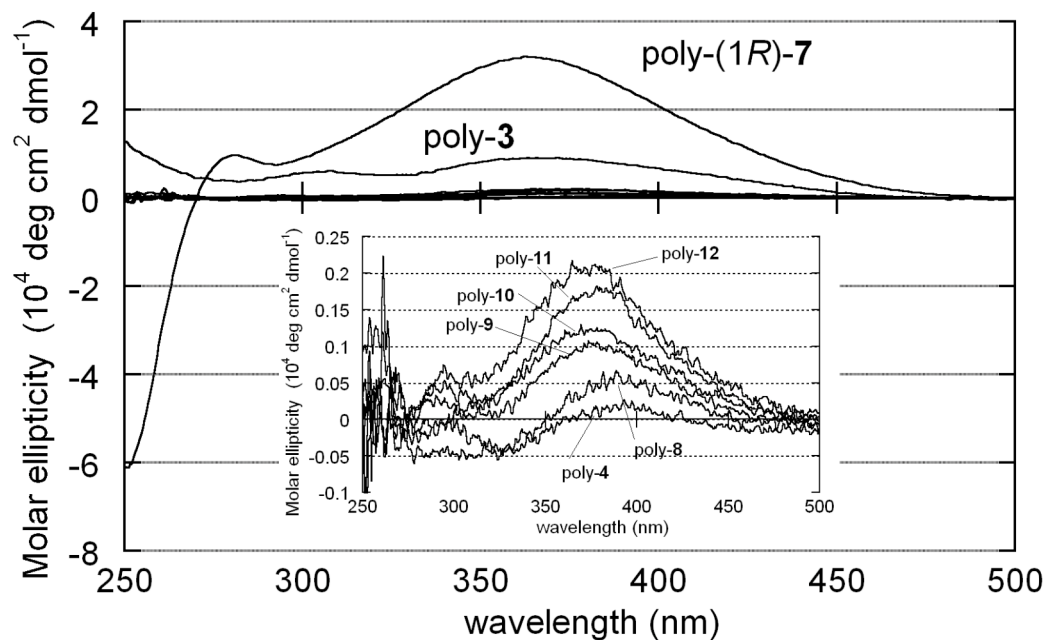

**Figure S10.** UV/vis absorption spectrum and CD spectrum of **Poly-(1*R*)-7** (Table1, Entry 5)

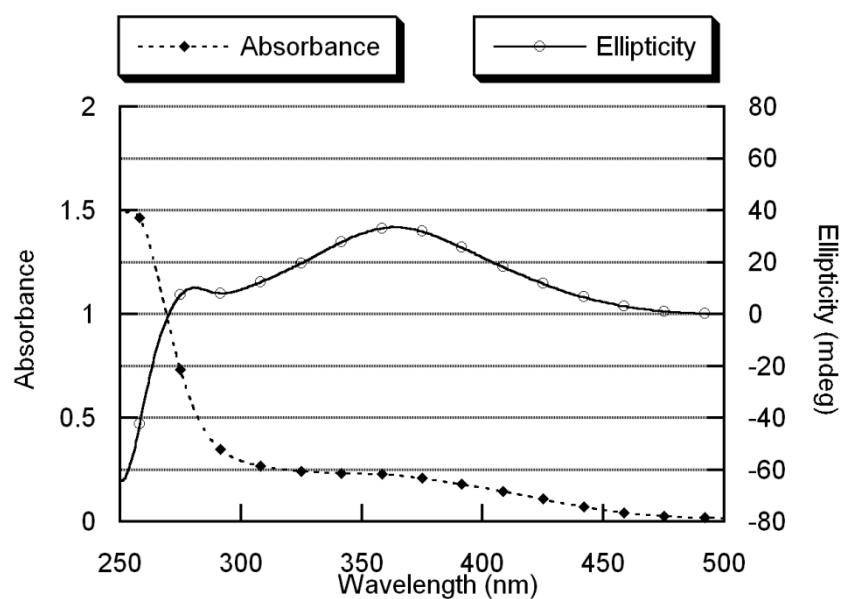

**Figure S11.** UV/vis absorption spectrum and CD spectrum of **Poly-3** (chiral initiator, Table1, Entry 12)

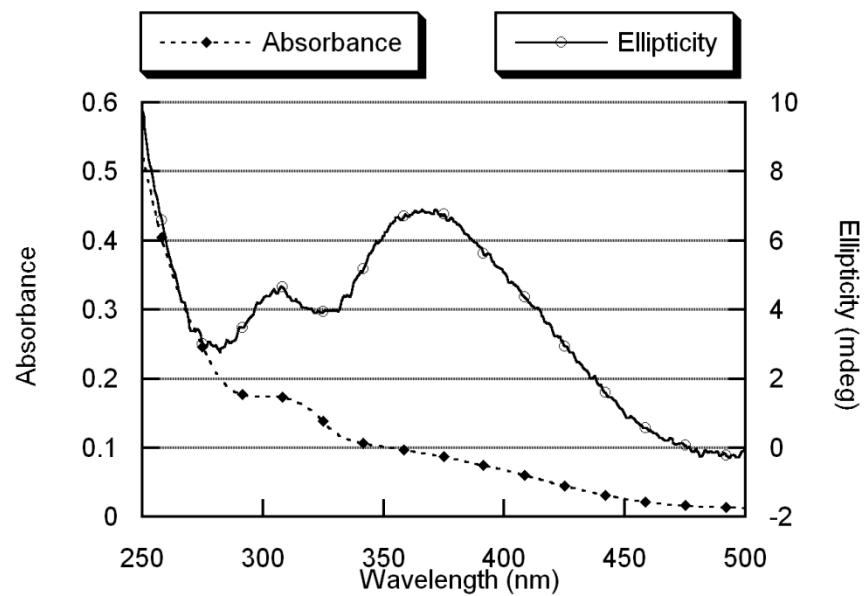

**Figure S12.** UV/vis absorption spectrum and CD spectrum of **Poly-4** (chiral initiator, Table1, Entry 6)

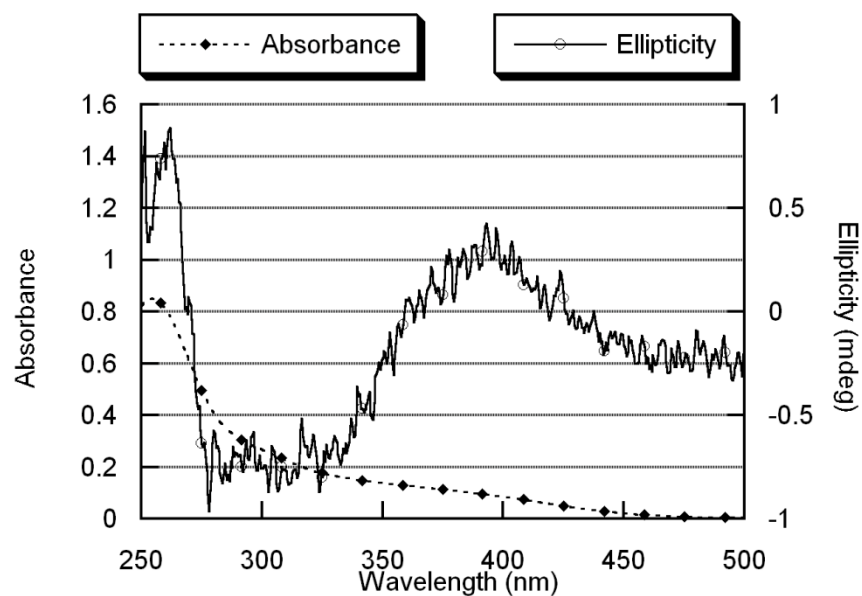

**Figure S13.** UV/vis absorption spectrum and CD spectrum of **Poly-8** (Table1, Entry 7)

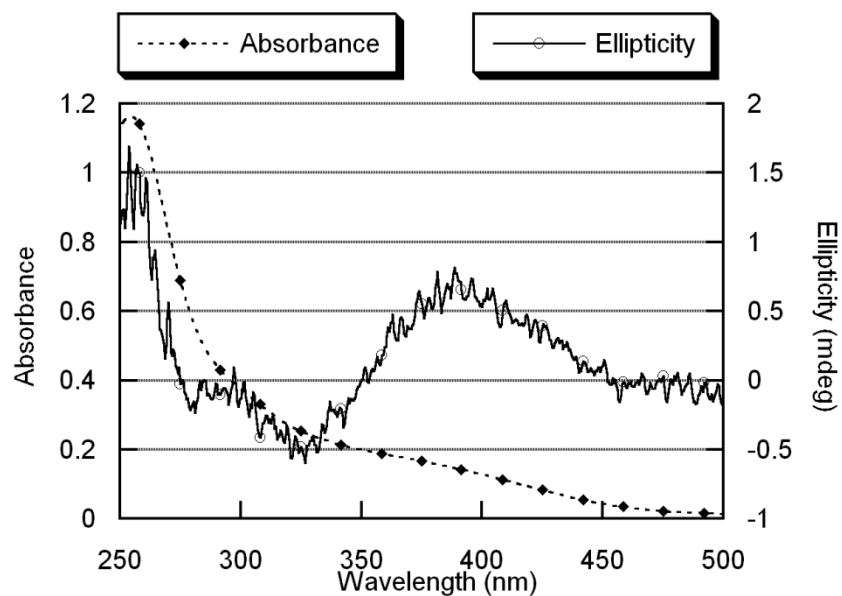



**Figure S14.** UV/vis absorption spectrum and CD spectrum of **Poly-9** (Table1, Entry 8)

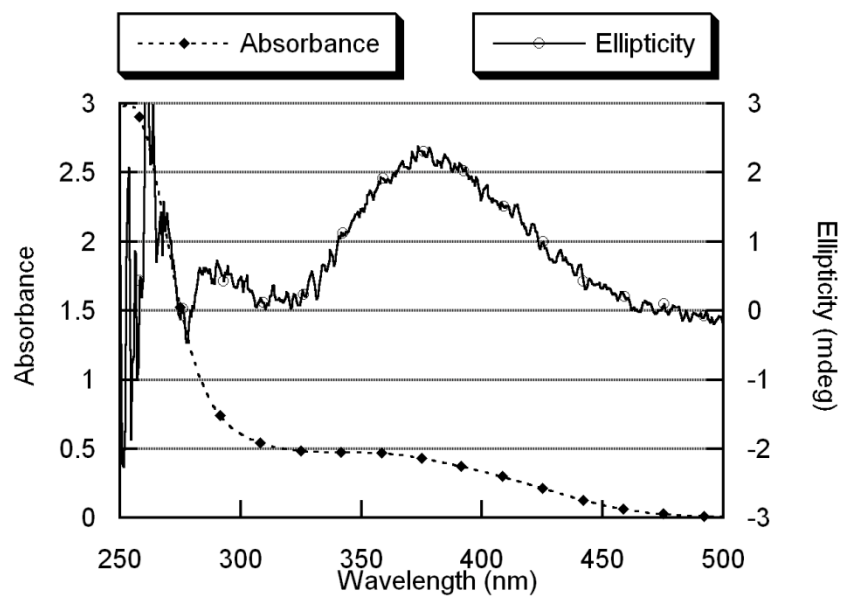

**Figure S15.** UV/vis absorption spectrum and CD spectrum of **Poly-10** (Table1, Entry 9)

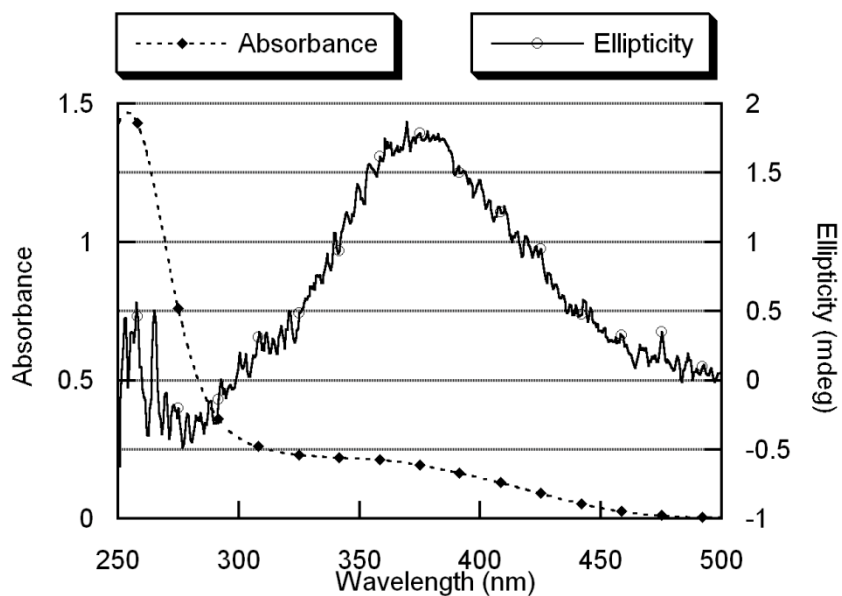

**Figure S16.** UV/vis absorption spectrum and CD spectrum of **Poly-11** (Table1, Entry 10)

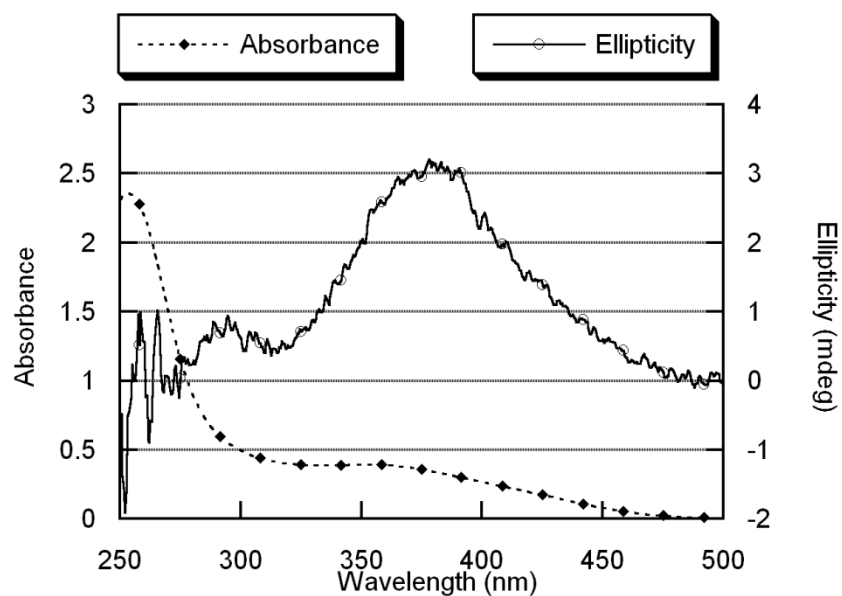

**Figure S17.** UV/vis absorption spectrum and CD spectrum of **Poly-12** (Table1, Entry 11)

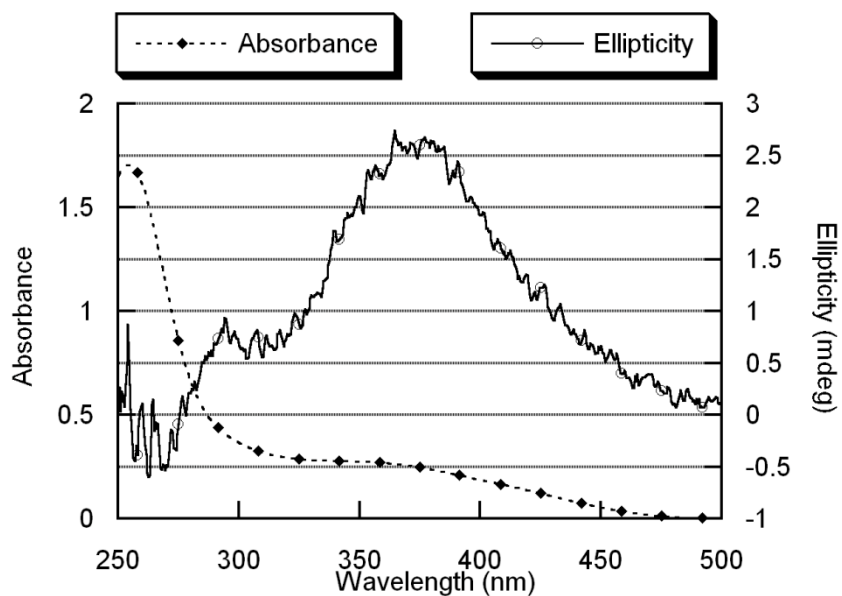

**Figure S18.** UV/vis absorption spectrum and CD spectrum of **Homopolymer 14** (Figure 2)

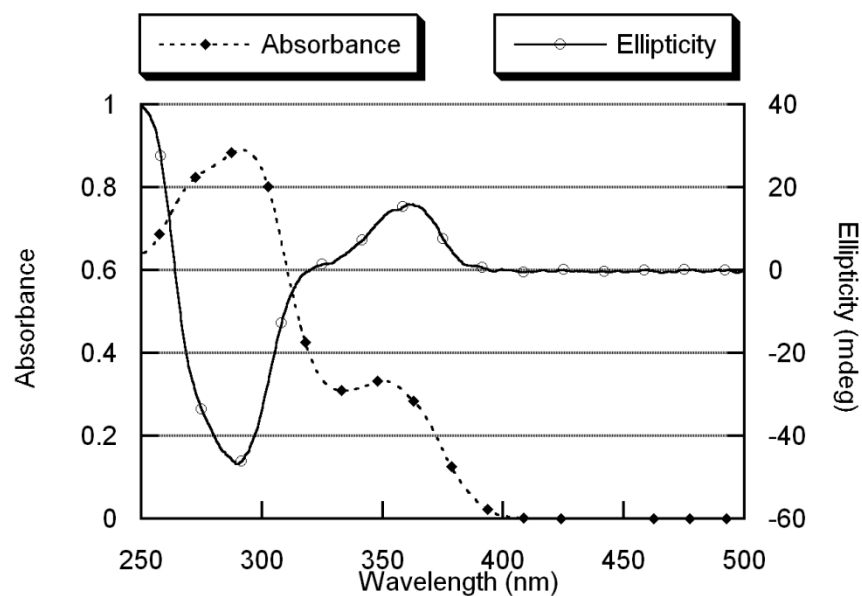

**Figure S19.** UV/vis absorption spectrum and CD spectrum of **Diblock copolymer 15a** (Figure 2)

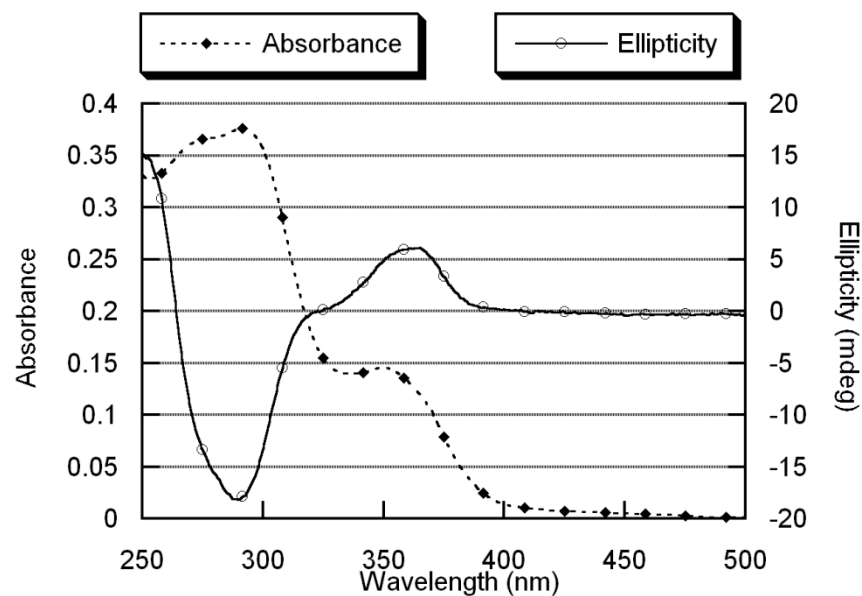

**Figure S20.** UV/vis absorption spectrum and CD spectrum of **Diblock copolymer 15b** (Figure 2)

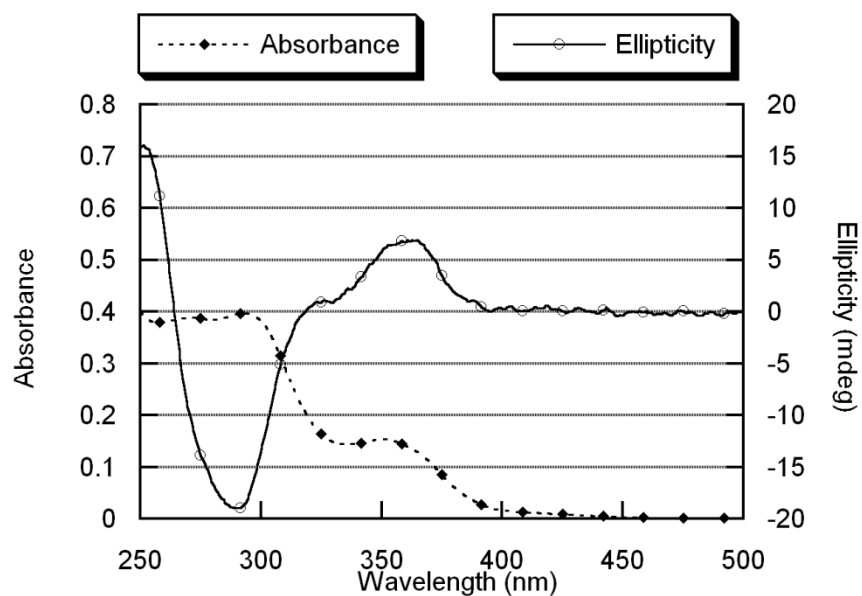

**Figure S21.** UV/vis absorption spectrum and CD spectrum of **Diblock copolymer 15c** (Figure 2)

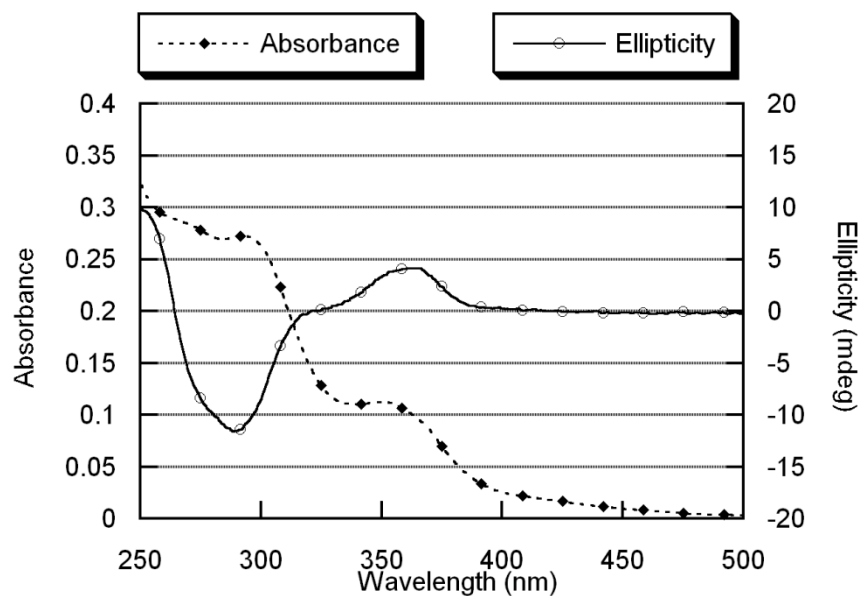

**Figure S22** UV/vis absorption spectrum and CD spectrum of **Triblock copolymer 16a** (Figure 2)

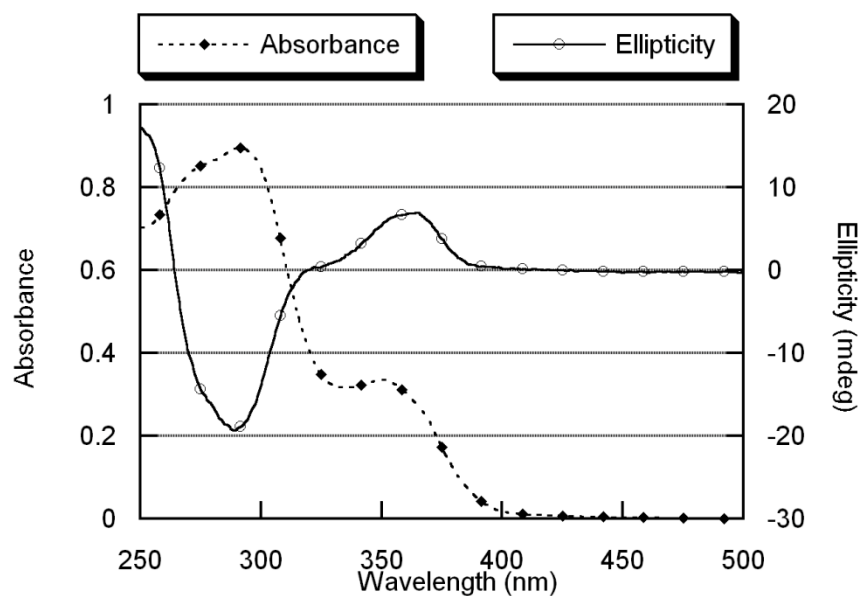

**Figure S23.** UV/vis absorption spectrum and CD spectrum of **Triblock copolymer 16b** (Figure 2)

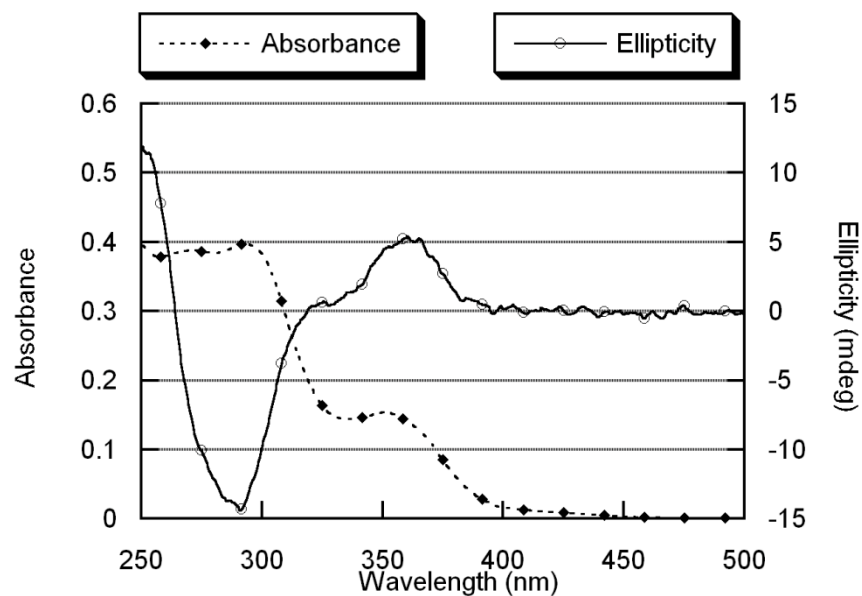

**Figure S24.** UV/vis absorption spectrum and CD spectrum of **Triblock copolymer 16c** (Figure 2)

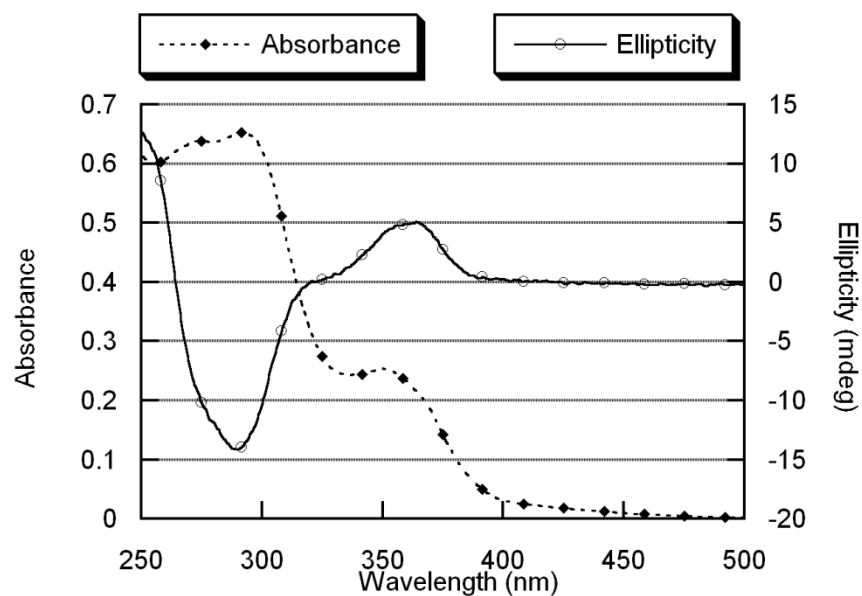

**Figure S25.** UV/vis absorption spectrum and CD spectrum of **Diblock copolymer 17** (Scheme 1)

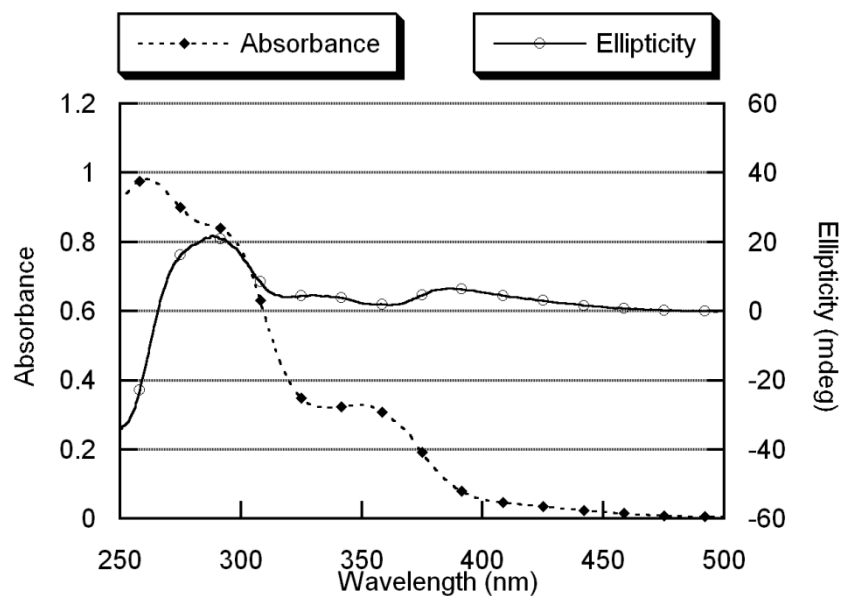

**Figure S26.** UV/vis absorption spectrum and CD spectrum of **Triblock copolymer 18** (Scheme 1)

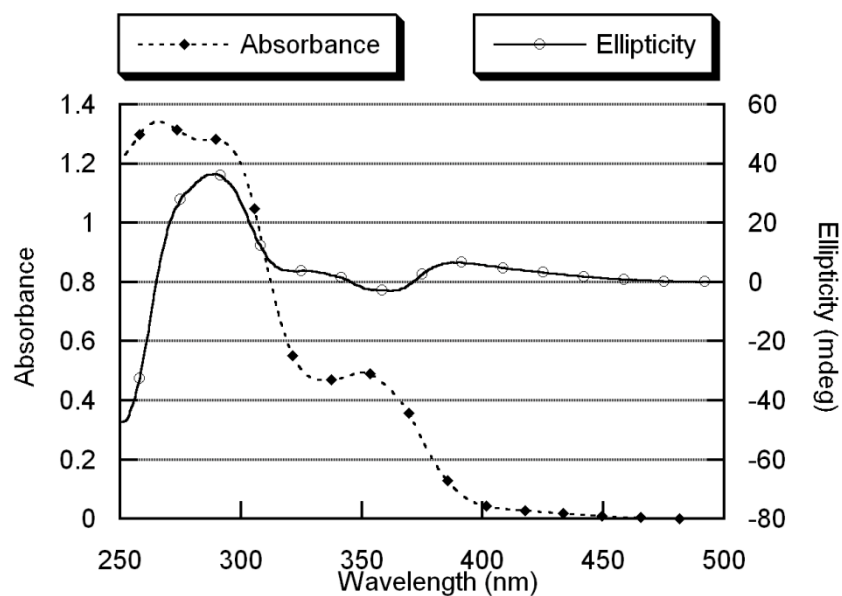

**Figure S27.** UV/vis absorption spectrum and CD spectrum of **Diblock copolymer 21** (Figure 3)

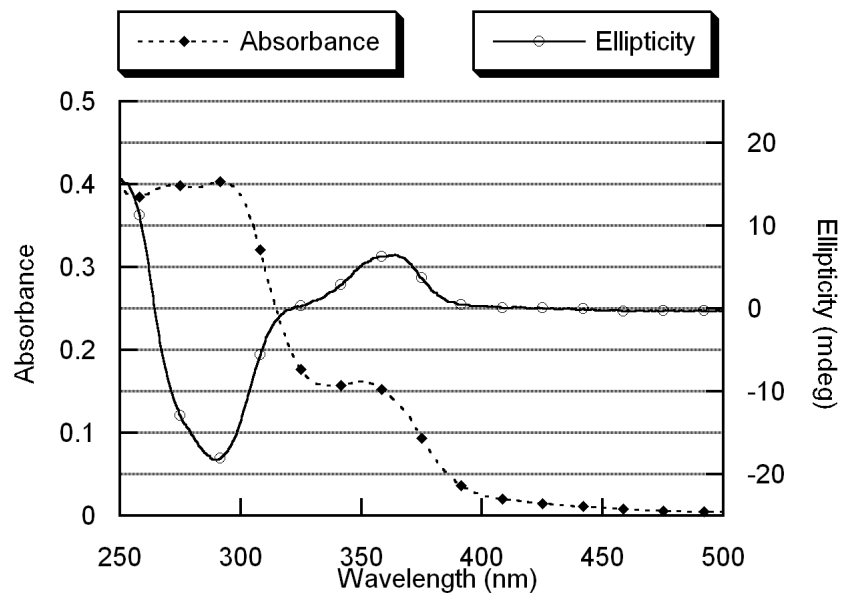

**Figure S28.** UV/vis absorption spectrum and CD spectrum of **Triblock copolymer 22** (Figure 3)

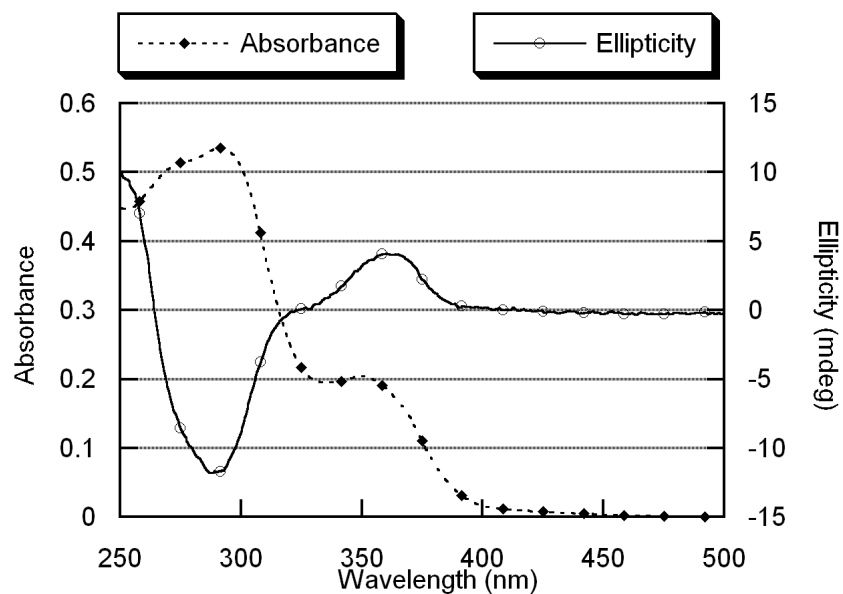

**Figure S29.** UV/vis absorption spectrum and CD spectrum of **Tetrablock copolymer 23** (Figure 3)

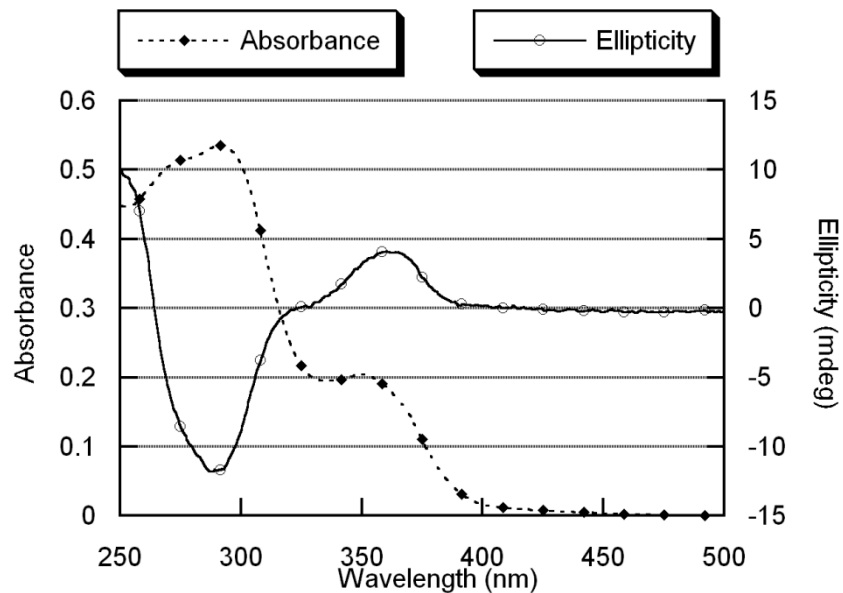



**Figure S30.** UV/vis absorption spectrum and CD spectrum of **Pentablock copolymer 19** (Figure 3)

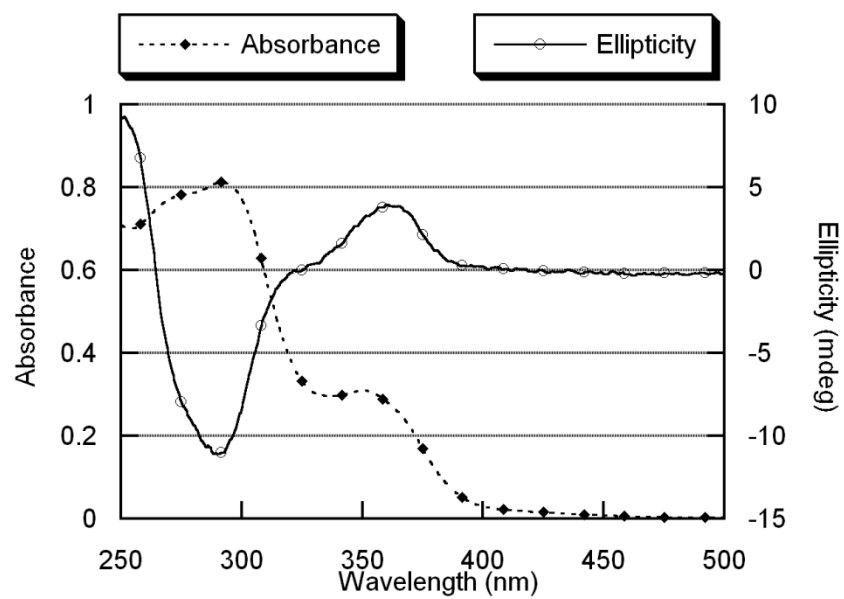

Supplement: Supplementary file 1 [file 4465084]
